# Supplementary material
Source: publisher site journal article supplement (https://www.dovepress.com/article/402698)
Supplement: Supplementary file 1 [file get_supplementary_file.php]

A sample of the materials used in PBL sessions

**Objectives**

By the end of the activities, the patients will able to learn about the principles of diet management for peritoneal dialysis

**Materials**

Activity sign-in sheet

Computer, projector

Food molds, such as meat, eggs, cartons of milk etc.

Food scale

**Trainers**

The head nurse

Two chief physicians

Two specialist nurses

**Activity**

1. Introduction (1 minute) :

a Activity name

b Agenda

2、Multimedia Teaching (40 minutes)

a Definition of protein

b Types of protein

c How to choose high-quality protein food, etc.

1. Discussion (30 minutes)

Tutor: head nurse

1. Why do people on peritoneal dialysis need to watch their diet?
2. What changes do I need to make to my diet?
3. What are some foods that are good to eat?
4. What if I get thirsty?
5. Q&A

4、Peer education and experiences sharing (10 minutes)

Daily diet recipes sharing

5、Game (10 minutes)

Play quiz to win prizes

6. Summary

| suppl table 1 Baseline scores of questionnaires before PBL activities | | | | |
| --- | --- | --- | --- | --- |
|  | Content | Traditional group | PBL group | *P* |
| Basic knowledge of PD | Environmental requirements | 6 | 6 | >0.05 |
| attention in PD fluid exchange | 27.22±2.61 | 27.32±2.68 |
| PD pipeline and outlet care | 21.90±0.61 | 21.96±0.78 |
| Complications of PD | 15.38±1.63 | 15.45±1.76 |
| Dietetic | 4.63±1.26 | 4.79±1.49 |
| Volume control | 9.00±1.57 | 9.00±1.66 |
| Patient's Self-management Behavior Ability | Liquid exchange technology | 16.27±1.41 | 16.47±1.36 | >0.05 |
| abilities to handle actual problems in practice | 9.06±1.1 | 9.06±1.07 |
| Diet management | 10.58±1.43 | 10.56±1.61 |
| Complication monitoring | 17.61±2.08 | 17.65±2.26 |
| Emotion Management and return to Social | 7.61±1.08 | 7.68±1.27 |
| Anxiety and depression | Anxiety | 52.24±4.47 | 52.29±4.52 | >0.05 |
| Depression | 49.86±6.74 | 49.87±6.72 |
| Quality of life and satisfaction | Good health | 12.83±0.97 | 12.83±1.01 | >0.05 |
| Mental health | 16.52±3.49 | 16.57±3.58 |
| burden on the kidney | 10.03±3.48 | 10.02±3.60 |
| Symptoms and discomfort | 24.80±8.52 | 24.83±8.71 |
| Impact of kidney disease | 22.37±5.94 | 22.23±6.89 |
| Degree of satisfaction | 90.91±1.42 | 90.85±1.30 |

PBL: Problem-based learning ; PD： Peritoneal dialysis
